# Supplementary material for: Uniform gallium oxyhydroxide nanorod anodes with superior lithium-ion storage
Source: Royal Society of Chemistry journal article supplement (doi:10.1039/c9ra07064h), 2019-01-01
Supplement: c9ra07064h1.pdf [file c9ra07064h1.pdf]

**Supporting information**

**Uniform Gallium Oxyhydroxide Nanorods Anodes with  
Superior Lithium-Ion Storage**

Jingjing Feng,<sup>a</sup> Bowen Fu,<sup>b</sup> Liang Fang,<sup>a</sup> Fang Wang,<sup>b</sup> Xin Zhang,<sup>b</sup> Yongtao Li,<sup>a\*</sup>

Yun Song<sup>b\*</sup>

*<sup>a</sup> School of Materials Science and Engineering, Anhui University of Technology,*

*Maanshan 243032, China*

*<sup>b</sup> Department of Materials Science, Fudan University, Shanghai 200433, P. R. China*

*\*Corresponding E-mail: songyun@fudan.edu.cn, toni-li@163.com*

The theoretical capacity of 1304 mAh/g for GaOOH is calculated via the following process:

$$C_0 = 1000 nF/3600M \quad (1)$$

$C_0$  is the theoretical specific capacity;  $F$  is Faraday constant ( $1F=96500$  C/mol);  $M$  is molecular weight of matter and  $M_{(GaOOH)}=102.72$ ;  $n$  is number of electrons in the flow-through reaction, and it is calculated as  $n=5$  according to the following redox reactions between GaOOH and lithium ions:

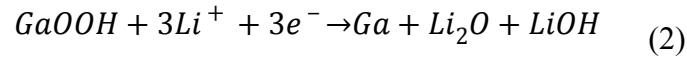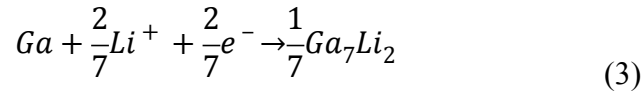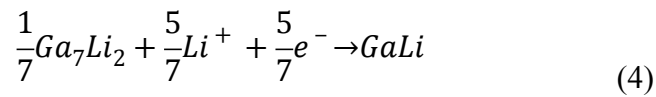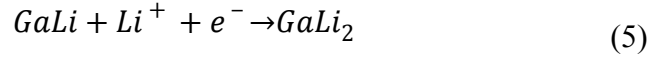

Substituting the above values into the formula(1):

$$C_{0(GaOOH)} = \frac{1000 * 5 * 96500}{3600 * 102.72} \approx 1304 \text{ (mAh/g)}$$

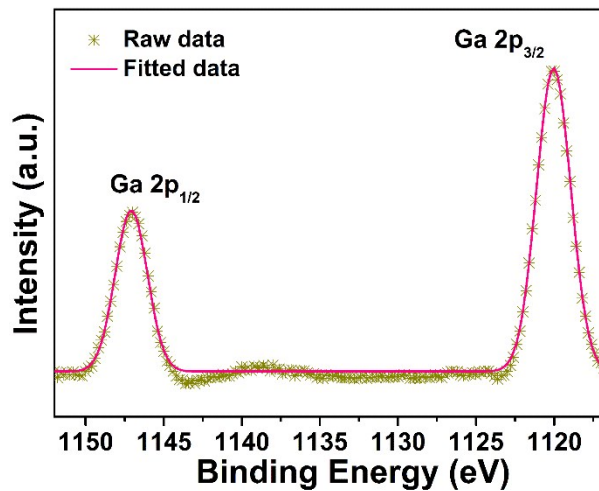

Fig. S1 Ga 2p XPS spectrum of GaOOH nanorods.

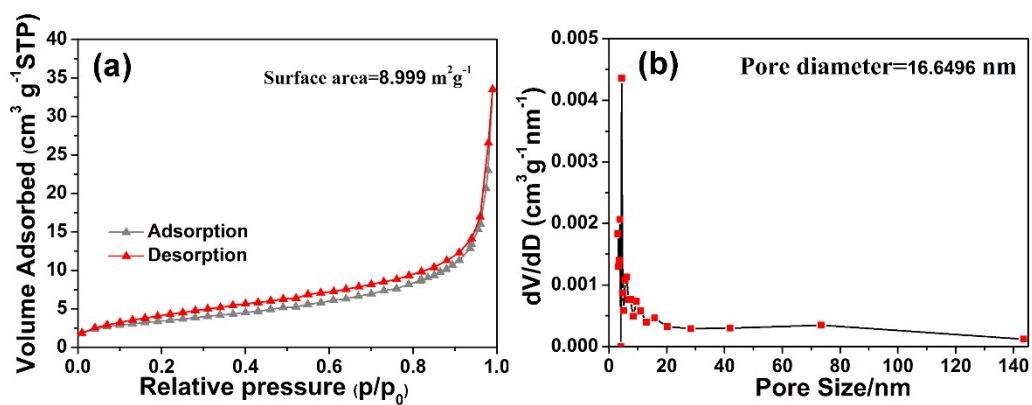

**Fig. S2** (a)  $N_2$  adsorption–desorption isotherms and (b) pore size distribution curve of GaOOH nanorods.

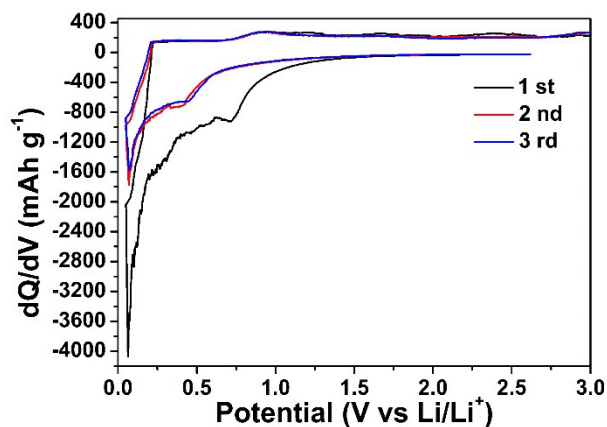

**Fig. S3** Plots of  $dQ/dV$  vs. potential for GaOOH nanorods.

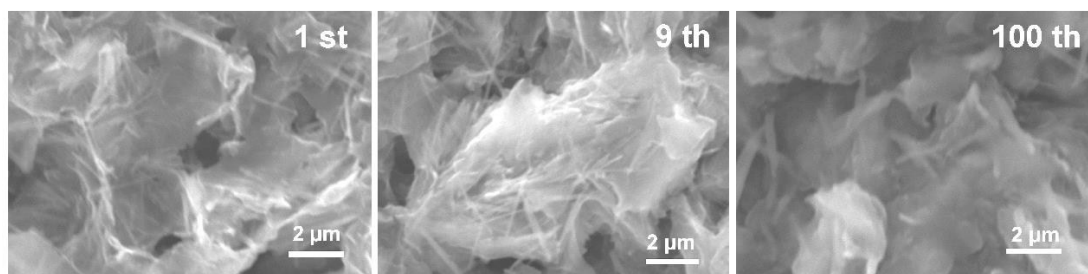

**Fig. S4** TEM images of the morphology of the products after 1<sup>st</sup>, 9<sup>th</sup> and 100<sup>th</sup> cycles.

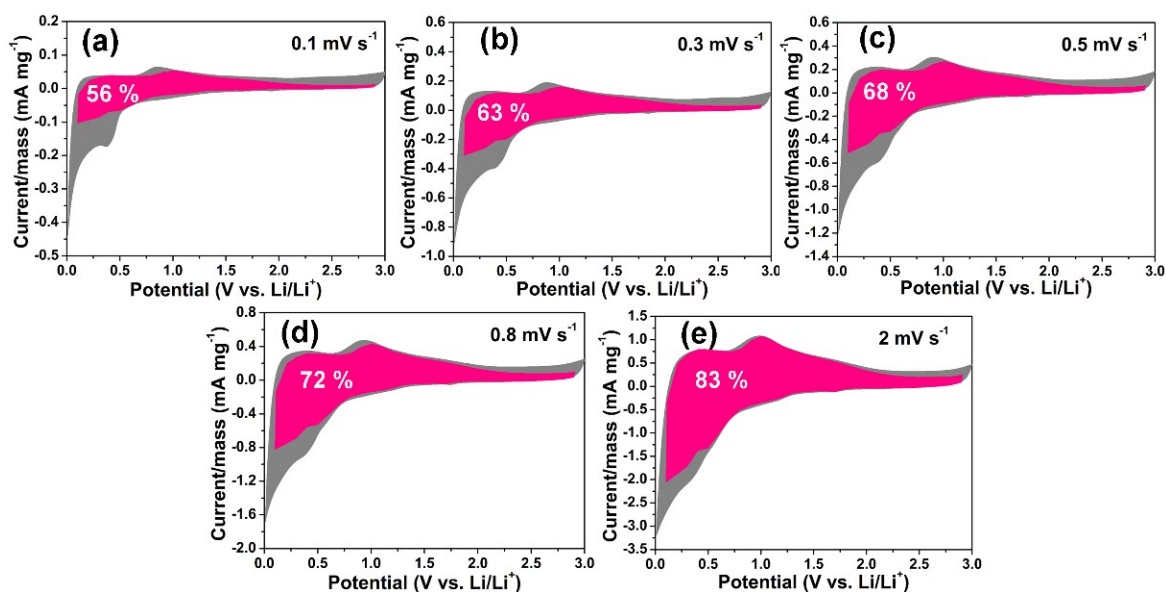

Fig. S5 CV curves with the pseudocapacitive contribution shown by the red region at a scan rate of (a)  $0.1 \text{ mV} \cdot \text{s}^{-1}$ , (b)  $0.3 \text{ mV} \cdot \text{s}^{-1}$ , (c)  $0.5 \text{ mV} \cdot \text{s}^{-1}$ , (d)  $0.8 \text{ mV} \cdot \text{s}^{-1}$  and (e)  $2 \text{ mV} \cdot \text{s}^{-1}$ .

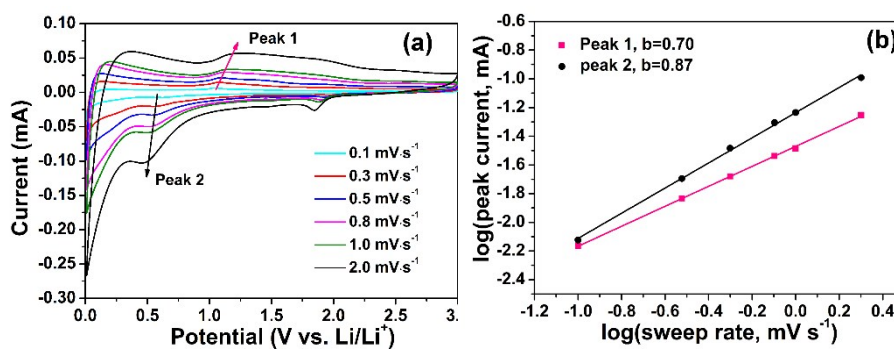

Fig.S6 (a) CV curves at scan rates from  $0.1$  to  $1.0 \text{ mV} \cdot \text{s}^{-1}$  of GaOOH-super p; (b) corresponding  $\log i$  vs.  $\log v$  plots at each redox peak of GaOOH-super p.

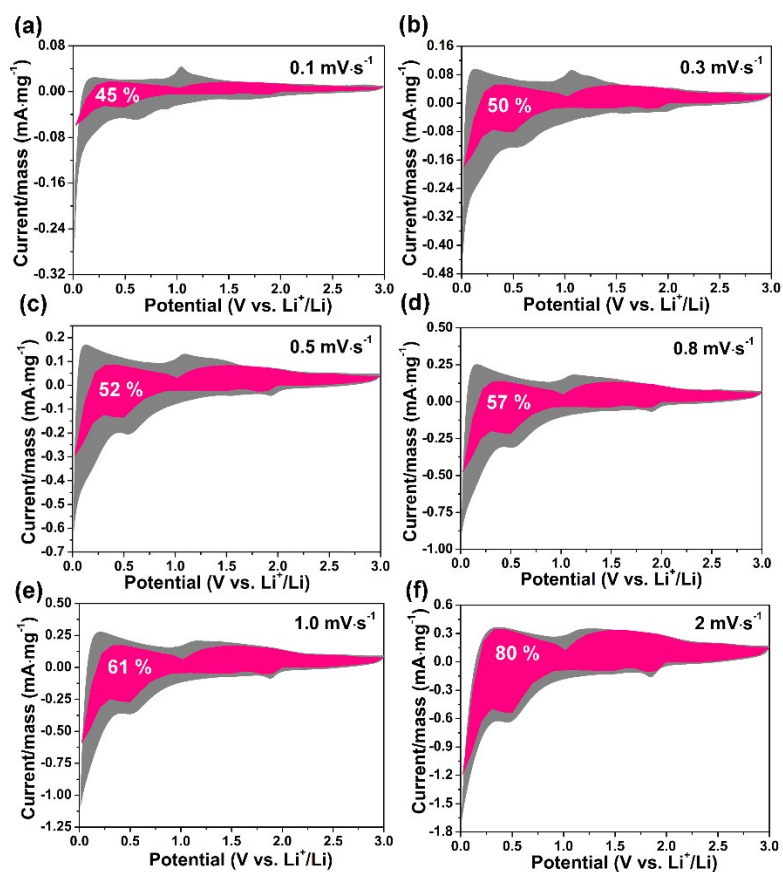

**Fig.S7** CV curves with the pseudocapacitive contribution for GaOOH-super p shown by the red region at a scan rate of (a) 0.1 mV·s<sup>-1</sup>, (b) 0.3 mV·s<sup>-1</sup>, (c) 0.5 mV·s<sup>-1</sup>, (d) 0.8 mV·s<sup>-1</sup>, (e) 1 mV·s<sup>-1</sup> and (f) 2 mV·s<sup>-1</sup>.

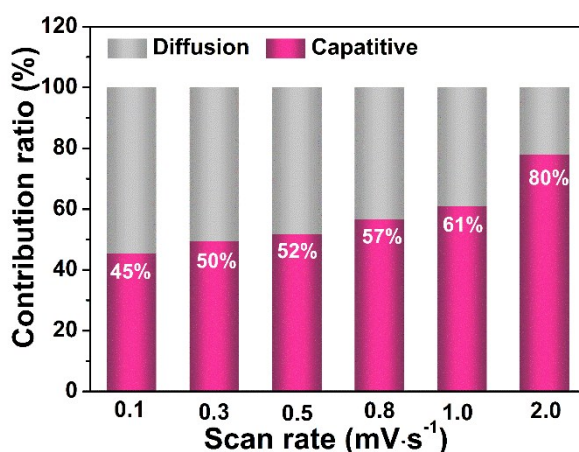

**Fig.S8** Normalized contribution ratio of GaOOH-super p at different scan rates.

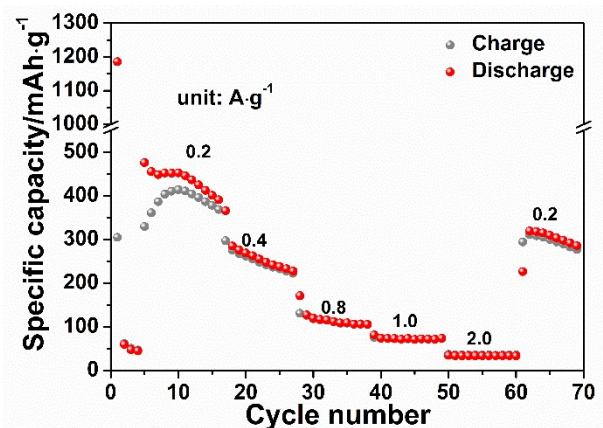

Fig.S9 Rate performance of GaOOH-super p.

**Table. S1** Comparison of the characteristic parameters of different Ga-based materials for LIBs applications.

| Anode materials                         | Current density (mA g <sup>-1</sup> ) | Cycling capacity (mAh g <sup>-1</sup> ) | Cycle number | Ref              |
|-----------------------------------------|---------------------------------------|-----------------------------------------|--------------|------------------|
| GaN NSs                                 | 1000                                  | 600                                     | 1000         | 1                |
| a-GaN@Cu                                | 10000                                 | 509                                     | 3000         | 2                |
| GaSe                                    | 100                                   | 760                                     | 50           | 3                |
| NiGa <sub>2</sub> O <sub>4</sub> /rGO   | 2000                                  | 669.8                                   | 1000         | 4                |
| ALD GaS <sub>x</sub> (x = 1.2)          | 120                                   | 766                                     | 100          | 5                |
| Ga <sub>2</sub> S <sub>3</sub>          | 100                                   | 600                                     | 10           | 6                |
| ZnGa <sub>2</sub> O <sub>4</sub>        | 100                                   | 679                                     | 50           | 7                |
| Ga <sub>2</sub> O <sub>3</sub> @C@G     | 100                                   | 458                                     | 50           | 8                |
| Ga <sub>2</sub> O <sub>3</sub> NSs/rGO  | 100                                   | 834                                     | 200          | 9                |
| Ga <sub>2</sub> O <sub>3</sub> -10% rGO | 50                                    | 770                                     | 40           | 10               |
| Ga <sub>2</sub> O <sub>3</sub> @C NPs   | 500                                   | 720                                     | 200          | 11               |
| <b>GaOOH nanorods</b>                   | <b>500</b>                            | <b>1089</b>                             | <b>300</b>   | <b>This work</b> |

## References:

- [1] C. Sun, M. Yang, T. Wang, Y. Shao, Y. Wu, X. Hao, *ACS Appl. Mater. Interfaces*, 2017, **9**, 26631-26636.
- [2] S. Ni, P. Huang, D. Chao, Gu. Yuan, L. Zhang, F. Zhao, J. Li, *Adv. Funt. Mater.* 2017, **27**, 1701808.
- [3] J. H. Jeong, D. W. Jung, E.S. Oh, *J ALLOY COMPD*, 2104, **613**, 42-45.
- [4] Y. Huang, J. Ouyang, X. Tang, Y. Yang, J. Qian, J. Lu, L. Xiao, L. Zhuang, *ACS Appl. Mater. Interfaces*, 2019, **11**, 8025-8031
- [5] X. Meng, K. He, D. Su, X. Zhang, C. Sun, Y. Ren, H. H. Wang, W. Weng, L. Trahey, C. P. Canlas, J. W. Elam, *Adv. Funt. Mater.*, 2014, **24**, 5435-5442.
- [6] H. Senoha, H. Kageyama, T. Takeuchi, K. Nakanishi, T. Ohta, H. Sakaebe, M. Yao, T. Sakai, K. Yasuda, *J. Power Sources.*, 2011, **196**, 5631-5636.
- [7] N. Han, D. Chen, Y. Pang, Z. Han, Y. Xia, X. Jiao, *Electrochimica Acta*, 2017, **235**, 295-303.
- [8] S. Ni, Q. Chen, J. Liu, S. Yang, T. Li, X. Yang, J. Zhao, New Insights into the Li-storage Mechanism in  $\alpha$ -Ga<sub>2</sub>O<sub>3</sub> Anode and the Optimized Electrode Design, *J. Power Sources*, 433 (2019) 126681.
- [9] M. Yang, C. Sun, T. Wang, F. Chen, M. Sun, L. Zhang, Y. Shao, Y. Wu, X. Hao, *ACS Appl. Energy Mater.*, 2018, **19**, 4708-4715.
- [10] S. B. Patil, I. Y. Kim, J. L. Gunjekar, S. M. Oh, T. Eom, H. Kim, S. J. Hwang, *ACS Appl. Mater. Interfaces*, 2015, **7**, 18679-18688.
- [11] X. Tang, X. Huang, Y. Huang, Y. Gou, J. Pastore, Y. Yang, Y. Xiong, J. Qian, J. D. Brock, J. Lu, L. Xiao, H. D. Abruna, L. Zhuang, *ACS Appl. Mater. Interfaces*, 2018, **10**, 5519-5526.
